# Supplementary material for: Comprehensive Characterization of Transgene Integration in a Similar Intragenesis Rice Event Using Paired-end Whole-genome Sequencing Approach
Source: Research Square preprint supplement (doi:10.21203/rs.3.rs-951165/v1), 2021-10-12
Supplement: Supplementary file 1 [file 79a955f484bcfef724014c31.docx]

**Supplementary Sequence File 1.**

**Assembled contigs from the 69 candidate read pairs**

>NODE_1_length_497_cov_10.398190

AAAATCATATCAATCCATTTTTTAAGTTATAGCTAATACTTAATTAATCATGCGCTAATAAGTCACTCTGTTTTTCGTACTAGAGAGATTGTTTTGAACCAGCACTCAAGAACACAGCCTTAACCCAGCCAAATAATGCTACAACCTACCAGTCCACACCTCTTGTAAAGCATTTGTTGCATGGAAAAGCTAAGATGACAGCAACCTGTTCAGGAAAACAACTGACAAGGTCATAGGGAGAGGGAGCTTTTGGAAAGGTGCCGTGCAGTTCAAACAATTAGTTAGCAGTAGGGTGTTGGTTTTTGCTCACAGCAATAAGAAGTTAATCATGGTGTAGGCAACCCAAATAAAACACCAAAATATGCACAAGGCAGTTTGTTGTATTCTGTAGTACAGACAAAACTAAAAGTAATGAAAGAAGATGTGGTGTTAGAAAAGGAAACAATATCATGAGTAATGTGTGAGCATTATGGGACCACGAAATAAAAAAAGAACAT

>NODE_2_length_478_cov_5.617021 (Confirmed 5’ flanking sequence of the transgene insertion)

CCTTCCCATGCCGTCAGGCTCAGGCATCACCGCGTTCTCACAAGTCACACCGAGTCCGCTGCCTTTCAACGTGACCGCTGACCGCTCGAGGCCAAGGGCGCGACCGCCGTCTCCCTCCCCTGCACCACGGCCTCCCTCCCCAGCGTCGCTCCACGGTCAACGCTCCCTACACCACCGATGTCCCTAACTCGATGTCGTATGCTACTGATGGTACTTGTCCTTGCTGCTGCATTGCATTATTTGAGGCCAACGTGACCTGTAGGAGTTTGATCCTAATGCATACTTGATGTATACTTGTTGAAAATTGATTGCTTTATTGCTGAAGTGTTTACTGCTGCTAGTATCACGAGCTGGCTCAAGCTTTGAAATGAGCCAAGCCAAACTTATATGTACTGAATTAACGCCGAATTAATTCGGGGGATCTGGATTTTAGTACTGGATTTTGGTTTTAGGAATTAGAAATTTTATTGATAGAAGT

>NODE_3_length_470_cov_4.913253

CCTACAACAACATGGCATCCATAAATCGCCCCATAGTTTTCTTCACAGTTTGCTTGTTCCTCTTGTGCGATGGCTCCCTAGCCCAGCAGCTATTAGGCCAGAGCACTAGTCAATGGCAGAGTTCTCGTCGTGGAAGTCCGAGAGGATGTAGATTTGATAGGTTGCAAGCATTTGAGCCAATTCGGAGTGTGAGGTCTCAAGCTGGCACAACTGAGTTCTTCGATGTCTCTAATGAGTTGTTTCAATGTACCGGAGTATCTGTTGTCCGCCGAGTTATTGAACCTAGAGGCCTACTACTACCCCATTACACTAATGGTGCATCTCTAGTATATATCATCCAAGGTTTGTGTAACAATTTAAGTGCATAATGAATTAATGATTGGCTGCGATATTTACATTGCTTGTAATTAACATGCATGCCATACTTTCAGGGAGAGGTATAACAGGGCCAACTTTCCCAGGCTGTCCTG

>NODE_4_length_434_cov_3.295515 (Confirmed 3’ flanking sequence of the transgene insertion)

AGGGAGACAAAAGTGCAAGGAAGAAAGAGAAGCATACCAACCAATAGCTTCACATGAGCTGTACAGTGGAAACGCTTTACTTTGTATGCTCCAATGTTAATTTGCTTCCTTCCTCCTTATCTACCATCGTTTCCTTGTATGCATCCATAGCTTTCAGGAAGTCAATATATCAAAAAAGAAAAAAAAAAGCTTTGCGAAAAACTATCTTGGACTTAAATACCAGTCAGATGTCTTGATTTGTTCTTTGGCACAGTGTATTTATTTTGGTACAGTATATTGTCGATGTGTAGACCTCGTCTAGCTGAAGGCCCATTCTGACTAGGGGTGGAATCGAGCGGCTCGACTTGGCTCGTGAAATCTTGGCAAAGAATAGGCTTTAATGTACTGAATTAACGCCGAATTAATTCGGGGGATCTGGATTTTAGTACTGGATT

>NODE_5_length_397_cov_26.973684

TTTACACTTTATGCTTCCGGCTCGTATGTTGTGTGGAATTGTGAGCGGATAACAATTTCACACAGGAAACAGCTATGACATGATTACGAATTCGCCCTGGATTTTGGTTTTAGGAATTAGAAATTTTATTGATAGAAGTATTTTACAAATACAAATACATACTAAGTTGTACAAAAACCAGCAACTCACTGCACTGCACTTCACTTCACTTCACTGTATGAATAAAAGTCTGGTGTCTGGTTCCTGATCGATGACTGACTACTCCACTTTGTGCAGAACAGATCTAGAGCTCGAGCTATTACTTGCGGAGGAACTCGCAGGCCTCGAGGAGCGGGGAGGTGGAGCACTTCTTGAGGTTGGTGATGCCGGCCACGTACTGCGGGCCGAGGTACTTCTC

>NODE_6_length_279_cov_4.107143

ATCATACAAACCTTGGATGATGTAGACCATGCTGAGAGTGTTGGTGTATCGAGGTACCAAAAGACCTTGAGGCTGAATGATACGTCGGATGACAAACGTACCAGTGTGCTGGAATAATTCATTCCTCTCATCAACATACTCAGTCACACCACCTTCTGATCTCACTTTCTGAAGTGACTCAAATGCTTGTAATCTATCAAATCTATACTCACTAAAACTTCCTTGATGAGGACTATGCCATGGGTTTGTTCTTGGATAAAATAGTTGGGCCATAGAATC

>NODE_7_length_266_cov_4.876777

GTATTCCTTGGTATCAGTCGTACCTTACGTCCCTTAAATACCGCGGTCGGGTATAACCCGTCAACAATGATCTCTCCTCTTTGGTCATTTTGACTCTGCGGCCTCTTTGCTGCTACTGTGTTGATGCCTAAAGCCTCACTTAGTTGCTCAACACCGATTCTGTTGAATATATTTTGCCTAGGGTGTTGCTCAATTGAGCTACCATATACTTGTTGAACTCTATTGTTGTTAGCAGCTAATAAGAATTCCTGAAACTTTTATCAATG

>NODE_8_length_96_cov_8.658537

CCCAACAGTTGCGCAGCCTGAATGGCGAATGCTAGAGCAGCTTGAGCTTGGATCAGATTGTCGTTTCCCGCCTTCAGTTTAAACTATCAGTGTTTG
