# Supplementary material for: Comprehensive Characterization of Transgene Integration in a Similar Intragenesis Rice Event Using Paired-end Whole-genome Sequencing Approach
Source: Research Square preprint supplement (doi:10.21203/rs.3.rs-951165/v1), 2021-10-12
Supplement: Supplementary file 2 [file c66f71cd0b39ecb4681fbac8.docx]

**Supplementary Sequence File 2**

**Assembled contigs from the read pairs mapping to the plasmid DNA sequence**

>NODE_1_length_9145_cov_25.624972 (The sequence of one copy inserted T-DNA fragment)

CAAACACTGATAGTTTAAACTGAAGGCGGGAAACGACAATCTGATCCAAGCTCAAGCTGCTCTAGCATTCGCCATTCAGGCTGCGCAACTGTTGGGAAGGGCGATCGGTGCGGGCCTCTTCGCTATTACGCCAGCTGGCGAAAGGGGGATGTGCTGCAAGGCGATTAAGTTGGGTAACGCCAGGGTTTTCCCAGTCACGACGTTGTAAAACGACGGCCAGTGCCAAGCTTTTGGAAAGGTGCCGTGCAGTTCAAACAATTAGTTAGCAGTAGGGTGTTGGTTTTTGCTCACAGCAATAAGAAGTTAATCATGGTGTAGGCAACCCAAATAAAACACCAAAATATGCACAAGGCAGTTTGTTGTATTCTGTAGTACAGACAAAACTAAAAGTAATGAAAGAAGATGTGGTGTTAGAAAAGGAAACAATATCATGAGTAATGTGTGAGCATTATGGGACCACGAAATAAAAAGAACATTTTGATGAGTCGTGTATCCTCGATGAGCCTCAAAAGTTCTCTCACCCCGGATAAGAAACCCTTAAGCAATGTGCAAAGTTTGCATTCTCCACTGACATAATGCAAAATAAGATATCATCGATGACATAGCAACTCATGCATCATATCATGCCTCTCTCAACCTATTCATTCCTACTCATCTACATAAGTATCTTCAGCTAAATGTTAGAACATAAACCCATAAGTCACGTTTGATGAGTATTAGGCGTGACACATGACAAATCACAGACTCAAGCAAGATAAAGCAAAATGATGTGTACATAAAACTCCAGAGCTATATGTCATATTGCAAAAAGAGGAGAGCTTATAAGACAAGGCATGACTCACAAAAATTCATTTGCCTTTCGTGTCAAAAAGAGGAGGGCTTTACATTATCCATGTCATATTGCAAAAGAAAGAGAGAAAGAACAACACAATGCTGCGTCAATTATACATATCTGTATGTCCATCATTATTCATCCACCTTTCGTGTACCACACTTCATATATCATGAGTCACTTCATGTCTGGACATTAACAAACTCTATCTTAACATTTAGATGCAAGAGCCTTTATCCCACTATAAATGCACGATGATTTCTCATTGTTTCTCACAAAAAGCATTCAGTTCATTAGTCCTACAACAACATGGCATCCATAAATCGCCCCATAGTTTTCTTCACAGTTTGCTTGTTCCTCTTGTGCGATGGCTCCCTAGCCCAGTCTAGACTGGCTGGCCGCCGCCGCCGCTCCGTGCAGTGGTGCACCGTGTCCCAGCCGGAGGCCACCAAGTGCTTCCAGTGGCAGCGCAACATGCGCCGCGTGCGCGGCCCGCCGGTGTCCTGCATCAAGCGCGACTCCCCGATCCAGTGCATCCAGGCCATCGCCGAGAACCGCGCCGACGCCGTGACCCTCGACGGCGGCTTCATCTACGAGGCCGGCCTCGCCCCGTACAAGCTCCGCCCGGTGGCCGCCGAGGTGTACGGCACCGAGCGCCAGCCGCGCACCCACTACTACGCCGTGGCCGTGGTGAAGAAGGGCGGCTCCTTCCAGCTCAACGAGCTGCAGGGCCTCAAGTCCTGCCACACCGGCCTCCGCCGCACCGCCGGCTGGAACGTGCCGATCGGCACCCTCCGCCCGTTCCTCAACTGGACCGGCCCGCCGGAGCCGATCGAGGCCGCCGTGGCCCGCTTCTTCTCCGCCTCCTGCGTGCCGGGCGCCGACAAGGGCCAGTTCCCGAACCTCTGCCGCCTCTGCGCCGGCACCGGCGAGAACAAGTGCGCCTTCTCCTCCCAGGAGCCGTACTTCTCCTACTCCGGCGCCTTCAAGTGCCTCCGCGACGGCGCCGGCGACGTGGCCTTCATCCGCGAGTCCACCGTGTTCGAGGACCTCTCCGACGAGGCCGAGCGCGACGAGTACGAGCTGCTCTGCCCGGACAACACCCGCAAGCCGGTGGACAAGTTCAAGGACTGCCACCTCGCCCGCGTGCCGTCCCACGCCGTGGTGGCCCGCTCCGTGAACGGCAAGGAGGACGCCATCTGGAACCTCCTCCGCCAGGCCCAGGAGAAGTTCGGCAAGGACAAGTCCCCGAAGTTCCAGCTCTTCGGCTCCCCGTCCGGCCAGAAGGACCTCCTCTTCAAGGACTCCGCCATCGGCTTCTCCCGCGTGCCGCCGCGCATCGACTCCGGCCTCTACCTCGGCTCCGGCTACTTCACCGCCATCCAGAACCTCCGCAAGTCCGAGGAGGAGGTGGCCGCCCGCCGCGCCCGCGTGGTGTGGTGCGCCGTGGGCGAGCAGGAGCTGCGCAAGTGCAACCAGTGGTCCGGCCTCTCCGAGGGCTCCGTGACCTGCTCCTCCGCCTCCACCACCGAGGACTGCATCGCCCTCGTGCTCAAGGGCGAGGCCGACGCCATGTCCCTCGACGGCGGCTACGTGTACACCGCCGGCAAGTGCGGCCTCGTGCCGGTGCTCGCCGAGAACTACAAGTCCCAGCAGTCCTCCGACCCGGACCCGAACTGCGTGGACCGCCCGGTGGAGGGCTACCTCGCCGTGGCCGTGGTGCGCCGCTCCGACACCTCCCTCACCTGGAACTCCGTGAAGGGCAAGAAGTCCTGCCACACCGCCGTGGACCGCACCGCCGGCTGGAACATCCCGATGGGCCTCCTCTTCAACCAGACCGGCTCCTGCAAGTTCGACGAGTACTTCTCCCAGTCCTGCGCCCCGGGCTCCGACCCGCGCTCCAACCTCTGCGCCCTCTGCATCGGCGACGAGCAGGGCGAGAACAAGTGCGTGCCGAACTCCAACGAGCGCTACTACGGCTACACCGGCGCCTTCCGCTGCCTCGCCGAGAACGCCGGCGACGTGGCCTTCGTGAAGGACGTGACCGTGCTCCAGAACACCGACGGCAACAACAACGACGCCTGGGCCAAGGACCTCAAGCTCGCCGACTTCGCCCTCCTCTGCCTCGACGGCAAGCGCAAGCCGGTGACCGAGGCCCGCTCCTGCCACCTCGCCATGGCCCCGAACCACGCCGTGGTGTCCCGCATGGACAAGGTGGAGCGCCTCAAGCAGGTGCTCCTCCACCAGCAGGCCAAGTTCGGCCGCAACGGCTCCGACTGCCCGGACAAGTTCTGCCTCTTCCAGTCCGAGACCAAGAACCTCCTCTTCAACGACAACACCGAGTGCCTCGCCCGCCTCCACGGCAAGACCACCTACGAGAAGTACCTCGGCCCGCAGTACGTGGCCGGCATCACCAACCTCAAGAAGTGCTCCACCTCCCCGCTCCTCGAGGCCTGCGAGTTCCTCCGCAAGTAATAGCTCGAGCTCTAGATCTGTTCTGCACAAAGTGGAGTAGTCAGTCATCGATCAGGAACCAGACACCAGACTTTTATTCATACAGTGAAGTGAAGTGAAGTGCAGTGCAGTGAGTTGCTGGTTTTTGTACAACTTAGTATGTATTTGTATTTGTAAAATACTTCTATCAATAAAATTTCTAATTCCTAAAACCAAAATCCAGGGGTACCGAGCTTGCATGCCTGCAGTGCAGCGTGACCCGGTCGTGCCCCTCTCTAGAGATAATGAGCATTGCATGTCTAAGTTATAAAAAATTACCACATATTTTTTTTGTCACACTTGTTTGAAGTGCAGTTTATCTATCTTTATACATATATTTAAACTTTACTCTACGAATAATATAATCTATAGTACTACAATAATATCAGTGTTTTAGAGAATCATATAAATGAACAGTTAGACATGGTCTAAAGGACAATTGAGTATTTTGACAACAGGACTCTACAGTTTTATCTTTTTAGTGTGCATGTGTTCTCCTTTTTTTTTGCAAATAGCTTCACCTATATAATACTTCATCCATTTTATTAGTACATCCATTTAGGGTTTAGGGTTAATGGTTTTTATAGACTAATTTTTTTAGTACATCTATTTTATTCTATTTTAGCCTCTAAATTAAGAAAACTAAAACTCTATTTTAGTTTTTTTATTTAATAATTTAGATATAAAATAGAATAAAATAAAGTGACTAAAAATTAAACAAATACCCTTTAAGAAATTAAAAAAACTAAGGAAACATTTTTCTTGTTTCGAGTAGATAATGCCAGCCTGTTAAACGCCGTCGACGAGTCTAACGGACACCAACCAGCGAACCAGCAGCGTCGCGTCGGGCCAAGCGAAGCAGACGGCACGGCATCTCTGTCGCTGCCTCTGGACCCCTCTCGAGAGTTCCGCTCCACCGTTGGACTTGCTCCGCTGTCGGCATCCAGAAATTGCGTGGCGGAGCGGCAGACGTGAGCCGGCACGGCAGGCGGCCTCCTCCTCCTCTCACGGCACCGGCAGCTACGGGGGATTCCTTTCCCACCGCTCCTTCGCTTTCCCTTCCTCGCCCGCCGTAATAAATAGACACCCCCTCCACACCCTCTTTCCCCAACCTCGTGTTGTTCGGAGCGCACACACACACAACCAGATCTCCCCCAAATCCACCCGGCGGCCCCTCCGCTTCAAGGTACGCCTCTCGTCCTCCCCCCCCCCTCTCTACCTTCTCTAGATCGGCGTTCCGGTCCATGGTTAGGGCCCGGTAGTTCTACTTCTGTTCATGTTTGTGTTAGATCCGTGTTTGTGTTAGATCCGTGCTGCTAGCGTTCGTACACGGATGCGACCTGTACGTCAGACACGTTCTGATTGCTAACTTGCCAGTGTTTCTCTTTGGGGAATCCTGGGATGGCTCTAGCCGTTCCGCAGACGGGATCGATTTCATGATTTTTTTTGTTTCGTTGCATAGGGTTTGGTTTGCCCTTTTCCTTTATTTCAATATATGCCGTGCACTTGTTTGTCGGGTCATCTTTTCATGCTTTTTTTTGTCTTGGTTGTGATGATGTGGTCTGGTTGGGCGGTCGTTCTAGATCGGAGTAGAATTCTGTTTCAAACTACCTGGTGGATTTATTAATTTTGGATCTGTATGTGTGTGCCATACATATTCATAGTTACGAATTGAAGATGATGGATGGAAATATCGATCTAGGATAGGTATACATGTTGATGCGGGTTTTACTGATGCATATACAGAGATGCTTTTTGTTCGCTTGGTTGTGATGATGTGGTGTGGTTGGGCGGTCGTTCATTCGTTCTAGATCGGAGTAGAATACTGTTTCAAACTACCTGGTGTATTTATTAATTTTGGAACTGTATGTGTGTGTCATACATCTTCATAGTTACGAGTTTAAGATGGATGGAAATATCGATCTAGGATAGGTATACATGTTGATGTGGGTTTTACTGATGCATATACATGATGGCATATGCAGCATCTATTCATATGCTCTAACCTTGAGTACCTATCTATTATAATAAACAAGTATGTTTTATAATTATTTTGATCTTGATATACTTGGATGATGGCATATGCAGCAGCTATATGTGGATTTTTTTAGCCCTGCCTTCATACGCTATTTATTTGCTTGGTACTGTTTCTTTTGTCGATGCTCACCCTGTTGTTTGGTGTTACTTCTGCAGGTCGACTCTAGAGGATCTACCATGGCCACCGCCGCCGCCGCGTCTACCGCGCTCACTGGCGCCACTACCGCTGCGCCCAAGGCGAGGCGCCGGGCGCACCTCCTGGCCACCCGCCGCGCCCTCGCCGCGCCCATCAGGTGCTCAGCGGCGTCACCCGCCATGCCGATGGCTCCCCCGGCCACCCCGCTCCGGCCGTGGGGCCCCACCGATCCCCGCAAGGGATCTGGGGCCAACGACCTGATCTTCCTGGCCCAGCCGGGCGGCAGGCTGAACGGCAGGATCAGGGTGCCGGGCGACAAGAGCATCAGCCACAGGAGCATCATGCTGGGCAGCCTGGCCGAGGGCACCACCGAGGTGGAGGGCTTCCTGGAGGGCGAGGACGCCCTGGCCACCCTGCAGGCCTTCAGGGACATGGGCGTGGTGATCGAGGGCCCGAACCACGGCAGGGTGACCATCCACGGCGTGGGCCTGCACGGCCTGAAGCCGCCGCCGGGCCCGCTGTACGTGGGCAACAGCGGCACCAGCATGAGGCTGCTGAGCGGCCTGCTGGCCGGCCAGAGCTTCGACGTGACCATGACCGGCGACGCCAGCCTGAGCAAGAGGCCGATGAACAGGGTGGCCAACCCGCTGAGGGAGATGGGCGCCGTGGTGGAGACCGGCCCGGAGGGCAGGCCGCCGCTGACCATCAGGGGCGGCCACAAGCTGAAGGGCCTGACCTACACCCTGCCGATGGCCAGCGCCCAGGTGAAGAGCTGCCTGCTGCTGGCCGGCCTGTACGCCGAGGGCAAGACCACCGTGACCGAGCCGGCCCCGACCAGGGACCACACCGAGAGGATGCTGAGGGGCTTCGGCTACAGCGTGGAGAGCAACGGCCCGGTGGCCAGCCTGCAGAGCGGCGGCAAGCTGACCGCCACCAGGATCGAGGTGCCGGCCGACATCAGCAGCGCCGCCTTCTTCCTGGTGGCCGCCAGCATCGCCGAGGGCAGCGAGCTGGTGCTGGAGCACGTGGGCATCAACCCGACCAGGACCGGCGTGATCGACATCCTGAGGCTGATGGGCGGCGACATCACCCTGGAGAACCAGAGGGAGGTGGGCGGCGAGCCGGTGGCCGACCTGAGGGTGAGGGGCGCCCAGCTGAAGGGCATCGACATCCCGGAGGCCCTGGTGCCGCTGGCCATCGACGAGTTCCCGGTGCTGTTCGTGGCCGCCGCCTGCGCCGAGGGCAGGACCGTGCTGAGGGGCGCCGAGGAGCTGAGGGTGAAGGAGAGCGACAGGATTCAGGTGATGGCCGACGGCCTGATCACCCTGGGCATCAAGTGCGAGCCGACCCCGGACGGCATCATCATCGACGGCGGCCAGCTGGGCGGCGGCGAGGTGCACGGCCACGGCGACCACAGGATCGCGATGGCCTTCAGCGTGGCCAGCCTGAGGGCCAGCGCCCCGATCAGAATCCACGACTGCGCCAACGTGGCCACCAGCTTCCCGAACTTCCTGGCCCTGTGCGCCGAGGTGGGCATCAGGGTGGCCGAGGAGGGCAAGAGCTGACTCGAGCTCTAGATCTGTTCTGCACAAAGTGGAGTAGTCAGTCATCGATCAGGAACCAGACACCAGACTTTTATTCATACAGTGAAGTGAAGTGAAGTGCAGTGCAGTGAGTTGCTGGTTTTTGTACAACTTAGTATGTATTTGTATTTGTAAAATACTTCTATCAATAAAATTTCTAATTCCTAAAACCAAAATCCAGGGCGAATTCGTAATCATGTCATAGCTGTTTCCTGTGTGAAATTGTTATCCGCTCACAATTCCACACAACATACGAGCCGGAAGCATAAAGTGTAAAGCCTGGGGTGCCTAATGAGTGAGCTAACTCACATTAATTGCGTTGCGCTCACTGCCCGCTTTCCAGTCGGGAAACCTGTCGTGCCAGCTGCATTAATGAATCGGCCAACGCGCGGGGAGAGGCGGTTTGCGTATTGGCTAGAGCAGCTTGCCAACATGGTGGAGCACGACACTCTCGTCTACTCCAAGAATATCAAAGATACAGTCTCAGAAGACCAAAGGGCTATTGAGACTTTTCAACAAAGGGTAATATCGGGAAACCTCCTCGGATTCCATTGCCCAGCTATCTGTCACTTCATCAAAAGGACAGTAGAAAAGGAAGGTGGCACCTACAAATGCCATCATTGCGATAAAGGAAAGGCTATCGTTCAAGATGCCTCTGCCGACAGTGGTCCCAAAGATGGACCCCCACCCACGAGGAGCATCGTGGAAAAAGAAGACGTTCCAACCACGTCTTCAAAGCAAGTGGATTGATGTGAACATGGTGGAGCACGACACTCTCGTCTACTCCAAGAATATCAAAGATACAGTCTCAGAAGACCAAAGGGCTATTGAGACTTTTCAACAAAGGGTAATATCGGGAAACCTCCTCGGATTCCATTGCCCAGCTATCTGTCACTTCATCAAAAGGACAGTAGAAAAGGAAGGTGGCACCTACAAATGCCATCATTGCGATAAAGGAAAGGCTATCGTTCAAGATGCCTCTGCCGACAGTGGTCCCAAAGATGGACCCCCACCCACGAGGAGCATCGTGGAAAAAGAAGACGTTCCAACCACGTCTTCAAAGCAAGTGGATTGATGTGATATCTCCACTGACGTAAGGGATGACGCACAATCCCACTATCCTTCGCAAGACCCTTCCTCTATATAAGGAAGTTCATTTCATTTGGAGAGGACACGCTGAAATCACCAGTCTCTCTCTACAAATCTATCTCTCTCGAGTGGAGCAAGAAGAGGATAGCTACAGAGAGAATGGCAATAATGTAGGCGTTATCCATGGCTAAGCTGAGCTCACGAATGTGTGATGTGTTTCTGTGACTCTGGTGCACTGCTAAGACTGGAGATCTGGATCCAGATCTCCAGTCTTGATCCAGGGAGAGGTACTATGGGCTTAACTTTCCTCGGTTGCCCAGCAACTTACCAACAACAATTCCAACAATTTTCGCCTCAATGGCAAAGTGAAAGCCAAAAGTTTAGGGGCGAGCACCAACTGCAGGGTTCAACCTAATTAGCACGGTTGTTTATGTCATAAACATATATGGTAACAACAGGTGCATCACCATCATTGTAGAACCAATGTGCAACACCAGCTGGGAGTGGAATAATATCTCCTTGTCTAAATTGATAGATCTTTTGGTGCTCGTCCCTAAACTTTTGGCTTTCACTTTGCCATTGAGGCGAAAATTGTTGGAATTGTTGTTGGTAAGTTGCTGGGCAACCGAGGAAAGTTAAGCCCATAGTACCTCTCCCTGGATCAAGACTGGAGATCTGGATCCAGATCTCCAGTCTTAGCAGTGCACCAGAGTCACAGAAACACATCACACATTCGTGAGCTCAGCTTAGCCATGGATAACGCCTACATTATTGCCATTCTCTCTGTAGCTATCCTCTTCTTGCTCCACTCGAGTTTCTCCATAATAATGTGTGAGTAGTTCCCAGATAAGGGAATTAGGGTTCCTATAGGGTTTCGCTCATGTGTTGAGCATATAAGAAACCCTTAGTATGTATTTGTATTTGTAAAATACTTCTATCAATAAAATTTCTAATTCCTAAAACCAAAATCCAGGG

>NODE_2_length_279_cov_4.107143

ATCATACAAACCTTGGATGATGTAGACCATGCTGAGAGTGTTGGTGTATCGAGGTACCAAAAGACCTTGAGGCTGAATGATACGTCGGATGACAAACGTACCAGTGTGCTGGAATAATTCATTCCTCTCATCAACATACTCAGTCACACCACCTTCTGATCTCACTTTCTGAAGTGACTCAAATGCTTGTAATCTATCAAATCTATACTCACTAAAACTTCCTTGATGAGGACTATGCCATGGGTTTGTTCTTGGATAAAATAGTTGGGCCATAGAATC

>NODE_3_length_266_cov_4.876777

GTATTCCTTGGTATCAGTCGTACCTTACGTCCCTTAAATACCGCGGTCGGGTATAACCCGTCAACAATGATCTCTCCTCTTTGGTCATTTTGACTCTGCGGCCTCTTTGCTGCTACTGTGTTGATGCCTAAAGCCTCACTTAGTTGCTCAACACCGATTCTGTTGAATATATTTTGCCTAGGGTGTTGCTCAATTGAGCTACCATATACTTGTTGAACTCTATTGTTGTTAGCAGCTAATAAGAATTCCTGAAACTTTTATCAATG

>NODE_4_length_213_cov_3.765823

CGACTTATCAGCAACAATTCCAACAATTTTCGTCTCAAGGCCAAAGTCAAAGCCAAAAGTTTAGGGATGAGCATCAAAAGATCCATCAATTTAGACAAGGAGATGTTGTTGCACTCCCAGCTGGTGTTGCACATTGGTTCTACAATGATGGTGATGCATCGGTTGTTGCCATATATGTTTATGACATAAACAACAGTGCAAATCAACTTGAAC
